# Supplementary material for: Morphometrical, Morphological, and Immunocytochemical Characterization of a Tool for Cytotoxicity Research: 3D Cultures of Breast Cell Lines Grown in Ultra-Low Attachment Plates
Source: MDPI journal article supplement (doi:10.3390/toxics10080415), 2022-07-24
Supplement: s1 [file s1]

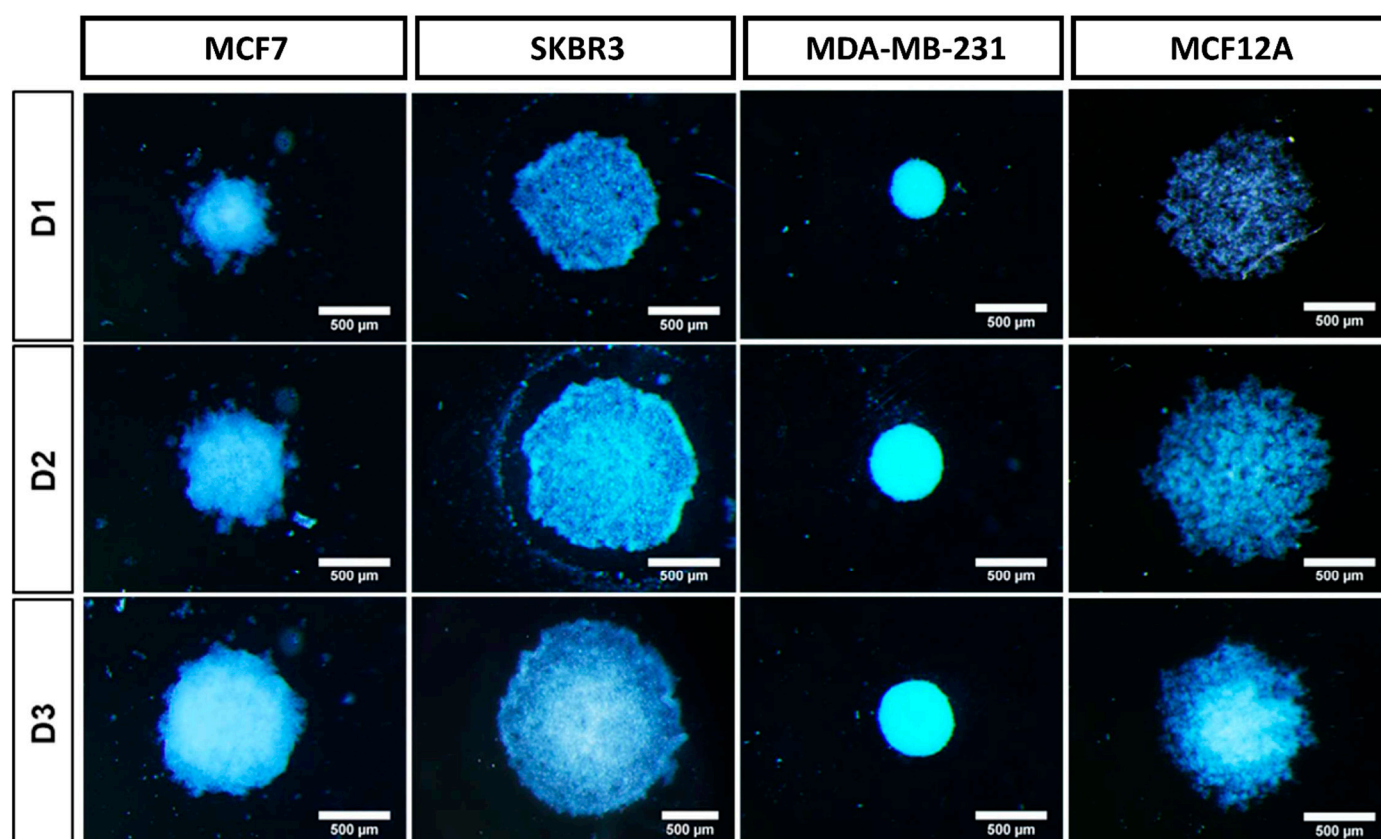

**Figure S1.** Representative images of the morphology (after 3 days in culture) of the 3D MCAs of MCF7, SKBR3, MDA-MB-231 and MCF12A cell lines seeded at three different cell densities. MCF-7 and SKBR3 cells were seeded  $10 \times 10^4$  cells/mL (D1),  $20 \times 10^4$  cells/mL (D2) and  $40 \times 10^4$  cells/mL (D3). MDA-MB-231 cells were seeded at  $20 \times 10^4$  cells/mL (D1),  $40 \times 10^4$  cells/mL (D2) and  $50 \times 10^4$  cells/mL (D3). MCF-12A cells were seeded at  $5 \times 10^4$  cells/mL (D1),  $10 \times 10^4$  cells/mL (D2), and  $20 \times 10^4$  cells/mL (D3).
